# Supplementary material for: Testis-expressed profilins 3 and 4 show distinct functional characteristics and localize in the acroplaxome-manchette complex in spermatids
Source: PubMed Central journal article supplement (PMC2694148; doi:10.1186/1471-2121-10-34), 2009-05-06

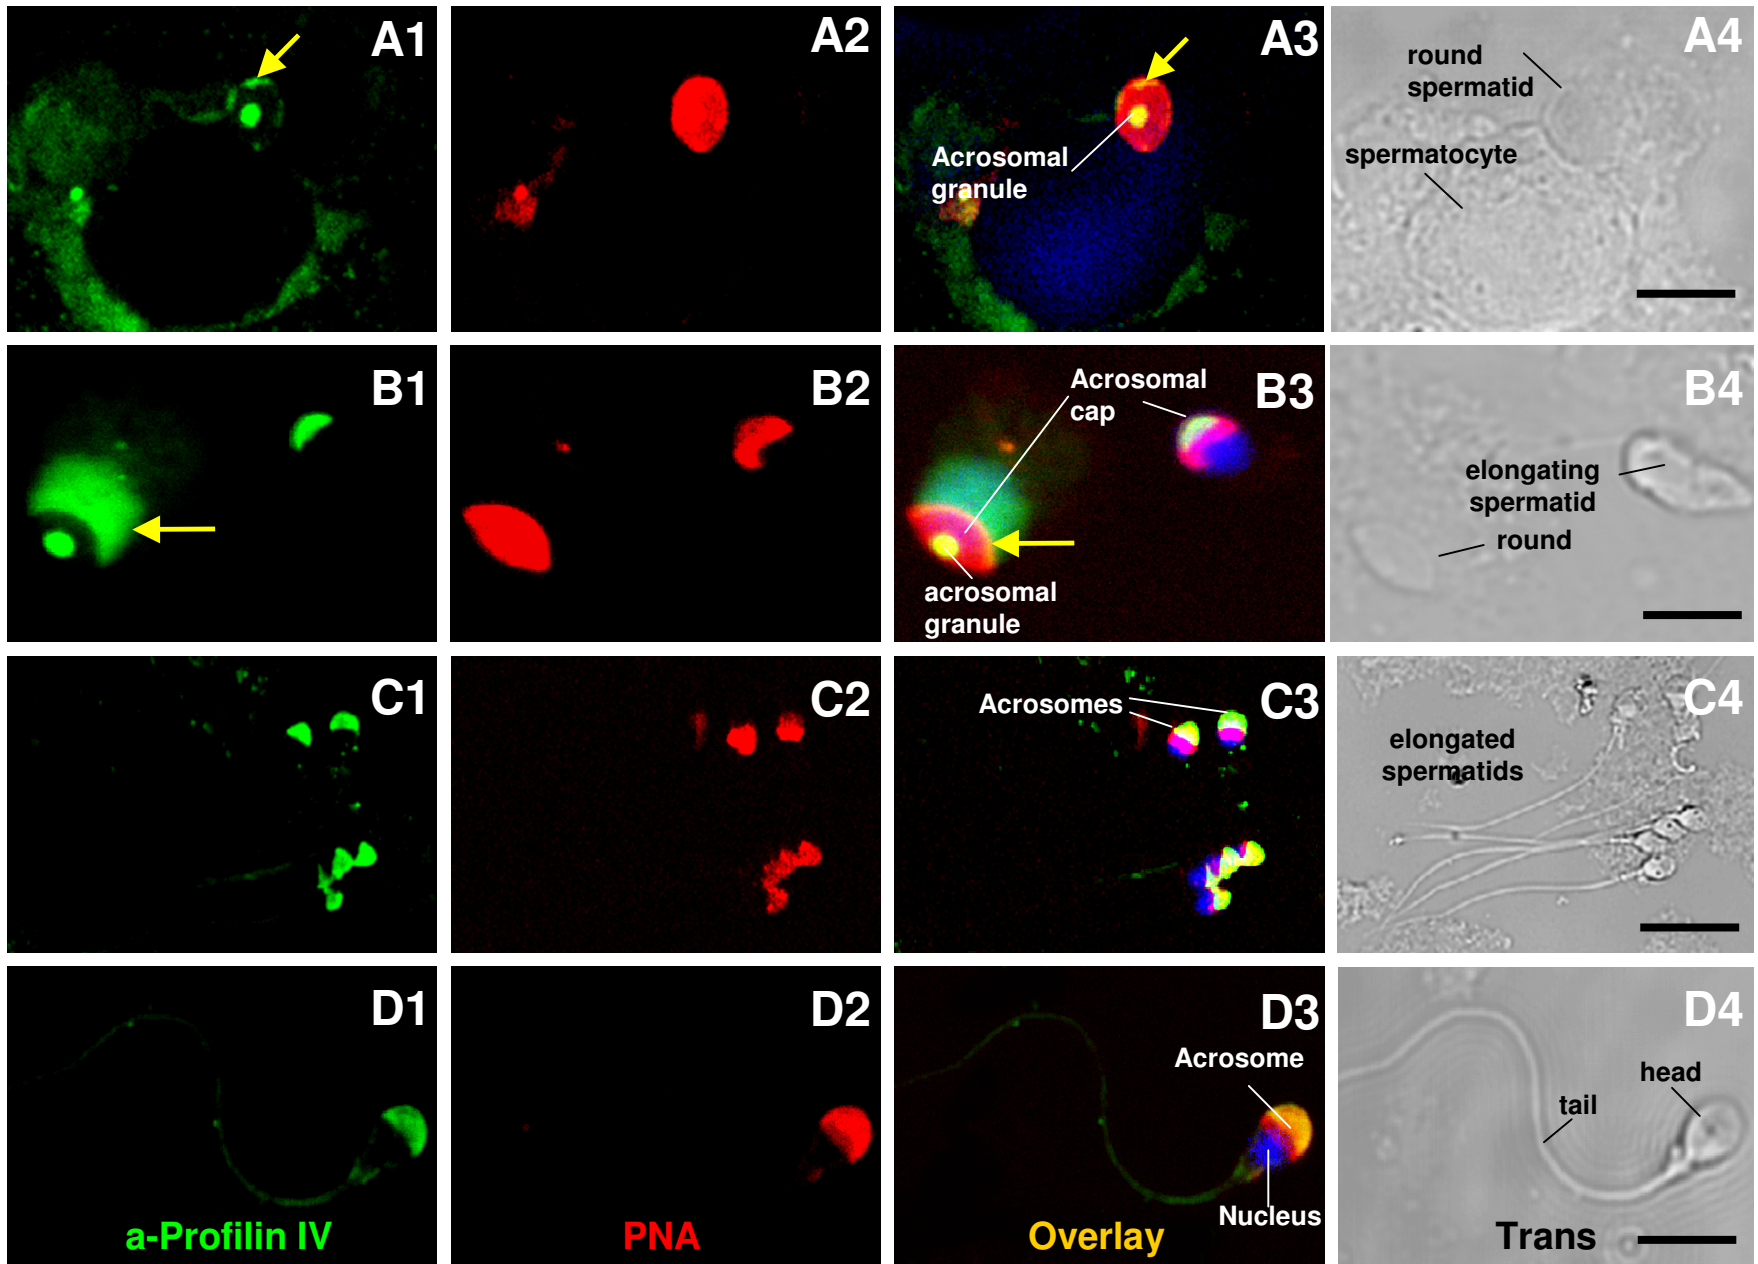

Supplement: 1471-2121-10-34-S1.pdf [file 1471-2121-10-34-S1.pdf]
